# Supplementary material
Source: PubMed Central journal article supplement (PMC1914393)

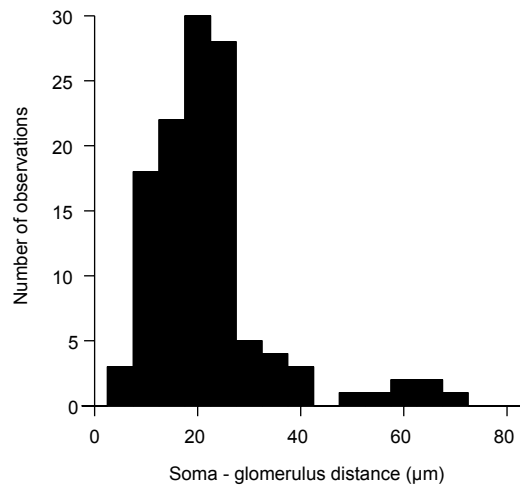

Supplement: pbio.0050178.sg001.pdf [file pbio.0050178.sg001.pdf]

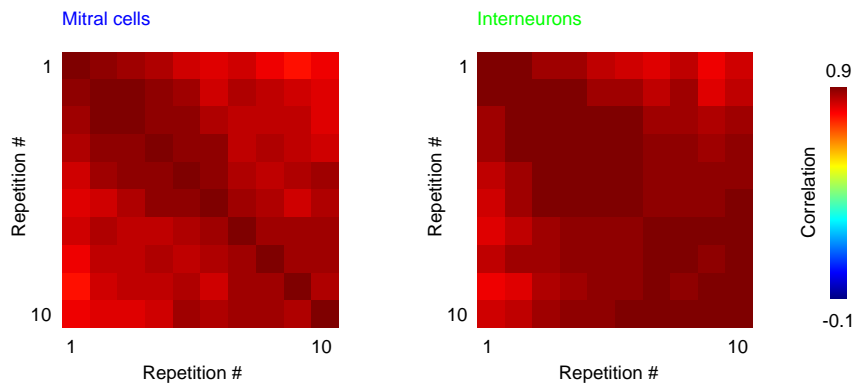

Supplement: pbio.0050178.sg002.pdf [file pbio.0050178.sg002.pdf]

MCs:

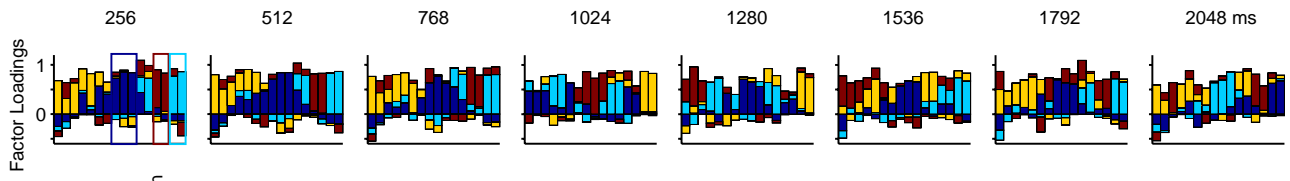

INs:

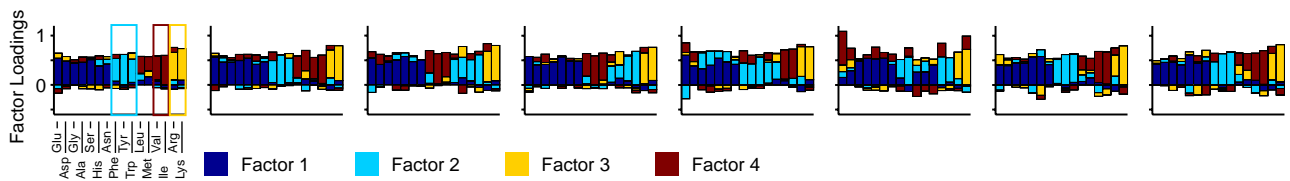

aromatic  
long-chain  
basic

Factor 1    Factor 2    Factor 3    Factor 4

Supplement: pbio.0050178.sg003.pdf [file pbio.0050178.sg003.pdf]

**A**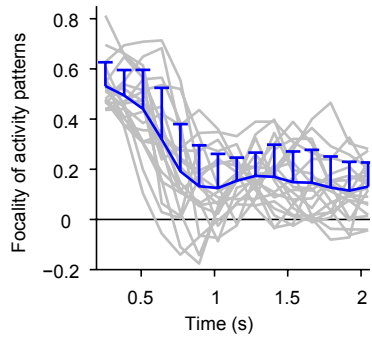**B**

No threshold

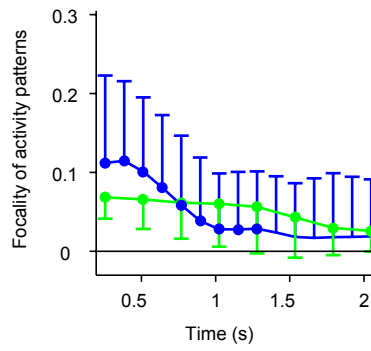**C**No threshold  
Negative values included  
Weights calculated by sum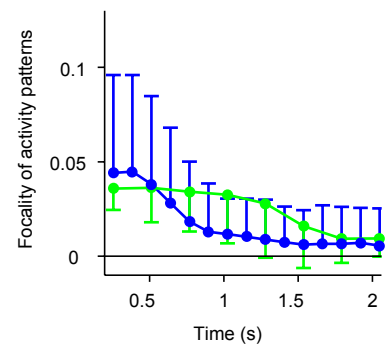**D**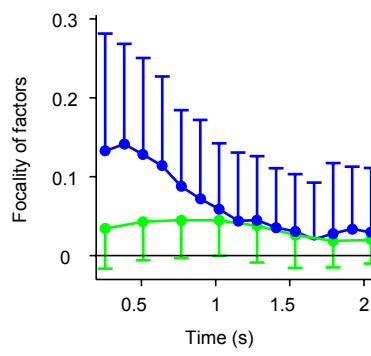**E**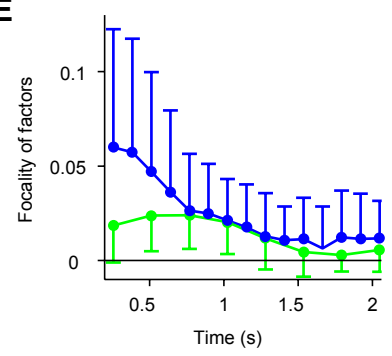

Supplement: pbio.0050178.sg004.pdf [file pbio.0050178.sg004.pdf]

Long-chain

Aromatic

Basic

Glomeruli:

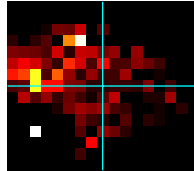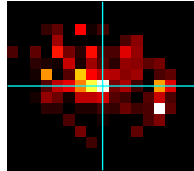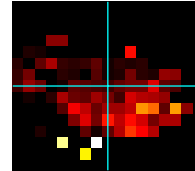

Mitral cells:

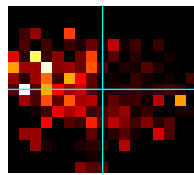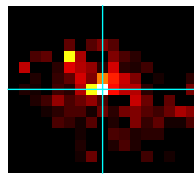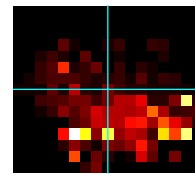

high  
Activity  
low

Interneurons:

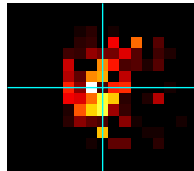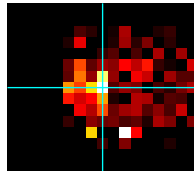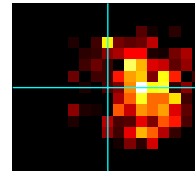

L  
M

100  $\mu$ m

P — A

Supplement: pbio.0050178.sg005.pdf [file pbio.0050178.sg005.pdf]
